# Supplementary material for: Prevalence of aldosterone breakthrough in dogs receiving renin‐angiotensin system inhibitors for proteinuric chronic kidney disease
Source: PubMed Central journal article supplement (PMC9708418; doi:10.1111/jvim.16573), 2022-11-09

**Supplemental Figure 1.** Median (solid line), interquartile range (dotted line), and distribution of urine aldosterone to creatinine ratio (UAldo:C) for 31 healthy dogs. The mixed sample contained equal aliquots of day 1 and 2 urine.

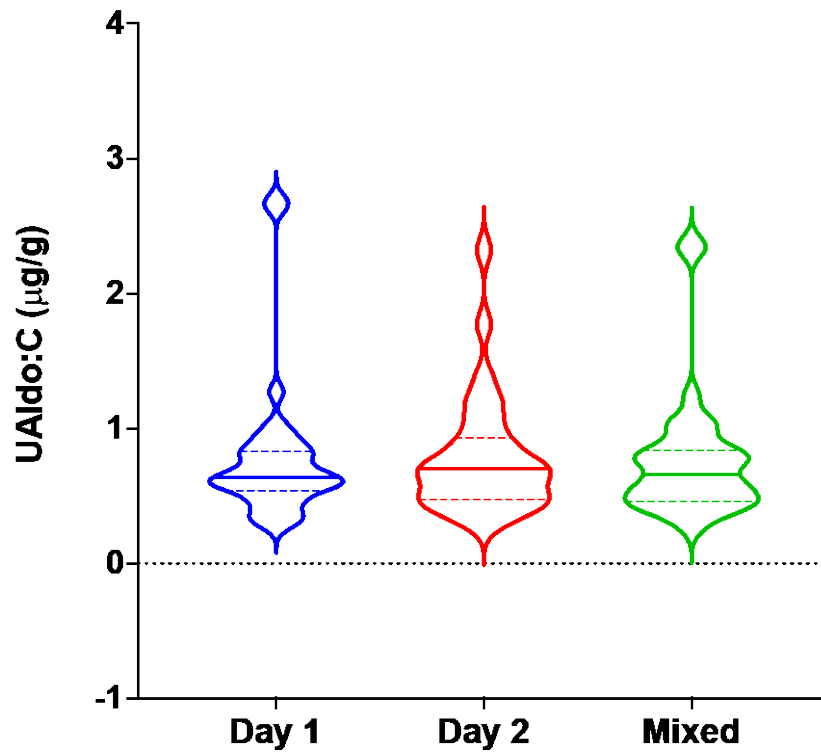

Supplement: JVIM-36-2088-s001.pdf [file JVIM-36-2088-s001.pdf]
