# Supplementary material for: Prevalence of aldosterone breakthrough in dogs receiving renin‐angiotensin system inhibitors for proteinuric chronic kidney disease
Source: PubMed Central journal article supplement (PMC9708418; doi:10.1111/jvim.16573), 2022-11-09
Supplement: JVIM-36-2088-s003.pdf [file JVIM-36-2088-s003.pdf]

**Supplemental Table 1:** Pertinent urinalysis and serum biochemistry parameters and PCV from 31 healthy dogs.

| <b>Parameter</b>              | <b>Median (IQR)</b>   | <b>Mean (SD)</b> | <b>Range</b>  | <b>Reference Interval</b> |
|-------------------------------|-----------------------|------------------|---------------|---------------------------|
| <b>USG</b>                    | 1.043 (1.035 - 1.053) | 1.043 (0.010)    | 1.017 - 1.064 | 1.015-1.045               |
| <b>BUN (mg/dL)</b>            | 16 (14 - 19)          | 16.84 (3.82)     | 10 - 29       | 7 - 30                    |
| <b>Creatinine (mg/dL)</b>     | 1.2 (1.0 - 1.3)       | 1.13 (0.18)      | 0.7 - 1.4     | 0.6 - 1.6                 |
| <b>Total Protein (g/dL)</b>   | 6.3 (6.1 - 6.5)       | 6.31 (0.30)      | 5.8 - 7.3     | 5.0 - 7.0                 |
| <b>Albumin (g/dL)</b>         | 3.7 (3.6 - 3.9)       | 3.72 (0.27)      | 2.7 - 4.1     | 3.0 - 4.3                 |
| <b>Na<sup>+</sup> (mEq/L)</b> | 149 (147 - 150)       | 148.7 (2.21)     | 144 - 154     | 142 - 152                 |
| <b>K<sup>+</sup> (mEq/L)</b>  | 4.53 (4.30 - 4.73)    | 4.51 (0.32)      | 3.69 - 5.24   | 3.9 - 5.4                 |
| <b>Cl<sup>-</sup> (mEq/L)</b> | 111.8 (110.4 - 114.0) | 112.1 (2.24)     | 108.8 - 117.7 | 108 - 118                 |
| <b>PCV (%)</b>                | 51 (48 - 56)          | 51.97 (5.44)     | 42 - 64       | 35 - 57                   |

**Supplemental Table 2:** Urine aldosterone, urine creatinine, and reference intervals and 90% confidence intervals for the lower and upper limits and the WCI/WRI for the urine aldosterone to creatinine (UAldo:C) reference interval (n=31 healthy dogs). WCI/WRI: width of the 90% confidence interval of the limits to width of the reference interval.

| Parameter                        | Median (IQR)       | Mean (SD)   | Range        | Reference Interval | 90% CI of Limits                     | WCI/WRI       |
|----------------------------------|--------------------|-------------|--------------|--------------------|--------------------------------------|---------------|
| Urine Aldosterone (pmol/L) Day 1 | 5235 (3195 - 7973) | 5591 (2812) | 1 - 13290    | n/a                | n/a                                  | n/a           |
| Urine Aldosterone (pmol/L) Day 2 | 5370 (3690 - 7620) | 6021 (3032) | 2 - 13590    | n/a                | n/a                                  | n/a           |
| Urine Aldosterone (pmol/L) Mixed | 5670 (3690 - 7650) | 5900 (2480) | 1530 - 12600 | n/a                | n/a                                  | n/a           |
| Urine Creatinine (mmol/L) Day 1  | 24 (17 - 35)       | 26 (10)     | 9.7 - 48     | n/a                | n/a                                  | n/a           |
| Urine Creatinine (mmol/L) Day 2  | 22 (20 - 37)       | 28 (11)     | 8.3 - 52     | n/a                | n/a                                  | n/a           |
| Urine Creatinine (mmol/L) Mixed  | 24 (19 - 34)       | 27 (9.8)    | 9.0 - 49     | n/a                | n/a                                  | n/a           |
| UAldo:C (µg/g) Day 1             | 0.64 (0.54 - 0.83) | 0.79 (0.55) | 0.28 - 2.7   | 0.23 - 1.82        | Lower: 0.17-0.32<br>Upper: 1.27-2.5  | 0.09 and 0.77 |
| UAldo:C (µg/g) Day 2             | 0.70 (0.47 - 0.93) | 0.79 (0.44) | 0.31 - 2.3   | 0.26 - 1.89        | Lower: 0.20-0.32<br>Upper: 1.40-2.35 | 0.07 and 0.58 |
| UAldo:C (µg/g) Mixed             | 0.66 (0.46 - 0.84) | 0.78 (0.48) | 0.27 - 2.4   | 0.24 - 1.81        | Lower: 0.18-0.33<br>Upper: 1.28-2.50 | 0.10 and 0.78 |
